# Supplementary material
Source: PubMed Central journal article supplement (PMC4270517)
Supplement: ijcep0007-8008-f3.pdf [file ijcep0007-8008-f3.pdf]

## Th1 and Th2 cytokines in DN

**Table S1.** Spearman's correlation analysis of Th-1/Th-2 cytokines with the clinical parameters

| Parameters r value | IL-2   | IL-12 | IFN-g  | IL-4   | IL-5   | IL-13   | IL-33   |
|--------------------|--------|-------|--------|--------|--------|---------|---------|
| Age                | -.038  | .007  | -.021  | -.012  | .066   | .107    | -.046   |
| BMI                | -.001  | .013  | -.010  | .052   | -.022  | -.038   | -.151*  |
| Systolic BP        | .104   | .056  | -.007  | -.013  | .038   | .002    | -.161*  |
| Diastolic BP       | .044   | .020  | -.049  | -.039  | .023   | .029    | -.158*  |
| FPG                | .149*  | .172* | .167*  | .156*  | .172*  | .065    | -.284** |
| CHO                | -.126  | .037  | -.160* | -.153* | .051   | .172*   | .067    |
| TRI                | .018   | .117  | -.025  | .026   | .070   | .134    | -.216** |
| HDL                | -.025  | -.028 | -.001  | -.098  | -.008  | -.016   | .147*   |
| LDL                | -.144* | .041  | -.160* | -.164* | .088   | .170*   | .153*   |
| VLDL               | .007   | .127  | -.010  | .046   | .074   | .187**  | -.189*  |
| Hb1AC              | .117   | .154* | .185** | .183** | .136*  | .066    | -.320** |
| Urea               | .049   | .022  | -.009  | -.048  | -.020  | -.179** | .007    |
| Creatinine         | .187** | -.053 | .033   | .027   | -.077  | -.287** | -.013   |
| Malb               | .088   | .122  | .015   | .034   | -.075  | -.259** | -.308** |
| GFR                | -.107  | -.028 | -.001  | .032   | -.147* | -.047   | -.117   |

Indicates \* = *P*-value is <0.05 and \*\* = *P*-value is <0.01. BMI-Body mass index, BP-Blood Pressure, FPG-Fasting Plasma Glucose, CHO-cholesterol, TGL-Triglyceride Lipids, HDL-High-Density Lipoprotein, LDL-Low-Density Lipoprotein, VLDL-Very Low-Density Lipoprotein, Hb1Ac-Glycated Haemoglobin, Malb-Micoalbuminuria, GFR-Glomerular Filtration Rate.

**Table S2.** Logistic regression analysis with disease phenotype as dependent variable

| Th1/Th2 Cytokines |   | NGT AND DM |       |          |       | DM AND DN |       |          |       |
|-------------------|---|------------|-------|----------|-------|-----------|-------|----------|-------|
|                   |   | Sig.       | OR    | 95% C.I. |       | Sig.      | OR    | 95% C.I. |       |
|                   |   |            |       | Lower    | Upper |           |       | Lower    | Upper |
| IL-2              | A | .462       | 1.000 | .998     | 1.001 | .917      | 1.005 | .909     | 1.112 |
|                   | B | .976       | 1.000 | .998     | 1.002 | .952      | 1.003 | .907     | 1.109 |
|                   | C | .253       | .998  | .994     | 1.002 | .813      | 1.012 | .916     | 1.119 |
| IL-12             | A | .435       | .999  | .996     | 1.002 | .001      | 1.250 | 1.126    | 1.388 |
|                   | B | .713       | 1.001 | .995     | 1.007 | .001      | 1.246 | 1.123    | 1.384 |
|                   | C | .482       | 1.002 | .996     | 1.009 | .001      | 1.239 | 1.117    | 1.376 |
| IFN-γ             | A | .142       | 1.000 | 1.000    | 1.001 | .001      | 1.020 | 1.011    | 1.030 |
|                   | B | .692       | 1.000 | 1.000    | 1.001 | .001      | 1.020 | 1.011    | 1.029 |
|                   | C | .352       | 1.000 | 1.000    | 1.001 | .001      | 1.019 | 1.010    | 1.029 |
| IL-4              | A | .873       | 1.003 | .963     | 1.045 | .034      | .199  | .045     | .882  |
|                   | B | .292       | 1.044 | .964     | 1.130 | .036      | .204  | .046     | .900  |
|                   | C | .410       | 1.047 | .938     | 1.169 | .028      | .193  | .045     | .839  |
| IL-5              | A | .864       | .999  | .993     | 1.006 | .150      | 1.331 | .902     | 1.963 |
|                   | B | .275       | .993  | .980     | 1.006 | .156      | 1.322 | .899     | 1.944 |
|                   | C | .329       | .991  | .974     | 1.009 | .106      | 1.369 | .935     | 2.003 |
| IL-13             | A | .003       | 1.005 | 1.002    | 1.008 | .001      | .427  | .300     | .609  |
|                   | B | .004       | 1.008 | 1.003    | 1.014 | .001      | .432  | .304     | .616  |
|                   | C | .499       | 1.002 | .996     | 1.009 | .001      | .441  | .310     | .627  |
| IL-33             | A | .001       | .994  | .991     | .998  | .024      | .997  | .994     | 0.998 |
|                   | B | .155       | .992  | .982     | 1.003 | .025      | .997  | .994     | 0.998 |
|                   | C | .487       | 0.996 | 1.008    | 1.233 | .031      | .997  | .994     | 0.998 |

A-unadjusted, B-adjusted for Fasting plasma glucose, C-adjusted for glycated hemoglobin, OR-Odds Ratio, CI-confidence interval.
